# Supplementary material
Source: Springer Nature journal article supplement (https://www.springermedizin.de/resource/supplementary/12894_2002_17_MOESM3_ESM.pdf/9513714)
Supplement: MOESM3 [file 9513714]

Additional file 3: Details of included studies

| Author                  | Condition | Methods                                                                                                                                                                                                                                                                             | Blinding | Baseline entry criteria                                                                                                                                                        | Patients                                                                                                                                                           | Finasteride Daily dose (mg)       | Control                            | Duration  | Efficacy outcomes Mean change from baseline                                                                                                                                                                                                                                                                                                                                                                                                                                                                                                                                                                                                                                                                                                                                                               | Efficacy outcomes Absolute values                                                                                                                                                                                                                                                                                                                                                                                                                                                                                                                                                                                                                    | Efficacy according to prostate size: finasteride                                                                                                                                    | Adverse events                                                                                                                                                        | Discontinuations                                                                                                                                                                                                        | AUR, surgery, prostate cancer | Quality score      |
|-------------------------|-----------|-------------------------------------------------------------------------------------------------------------------------------------------------------------------------------------------------------------------------------------------------------------------------------------|----------|--------------------------------------------------------------------------------------------------------------------------------------------------------------------------------|--------------------------------------------------------------------------------------------------------------------------------------------------------------------|-----------------------------------|------------------------------------|-----------|-----------------------------------------------------------------------------------------------------------------------------------------------------------------------------------------------------------------------------------------------------------------------------------------------------------------------------------------------------------------------------------------------------------------------------------------------------------------------------------------------------------------------------------------------------------------------------------------------------------------------------------------------------------------------------------------------------------------------------------------------------------------------------------------------------------|------------------------------------------------------------------------------------------------------------------------------------------------------------------------------------------------------------------------------------------------------------------------------------------------------------------------------------------------------------------------------------------------------------------------------------------------------------------------------------------------------------------------------------------------------------------------------------------------------------------------------------------------------|-------------------------------------------------------------------------------------------------------------------------------------------------------------------------------------|-----------------------------------------------------------------------------------------------------------------------------------------------------------------------|-------------------------------------------------------------------------------------------------------------------------------------------------------------------------------------------------------------------------|-------------------------------|--------------------|
| Abrams et al, BPH 1999  |           | Randomised, double blind, parallel group, placebo control. Assessments at baseline, 9 & 12 months. Compliance monitored by tablet count.                                                                                                                                            | Double   | Enlarged prostate by DRE<br>Lower urinary tract symptoms<br>Objective evidence of outlet obstruction (pressure flow)<br>Mean symptom score shows moderate / severe at baseline | Mean symptom score (AUA) at baseline:<br>Fin: 19.4 ± 6.3<br>Placebo: 17.4 ± 6.8<br>Mean age: 67 years                                                              | 5 mg (n=81)<br>At 9 & 12 mth n=69 | Placebo (n=40)<br>At 9 mth n=37    | 12 months | Total symptom score (AUA):<br>Fin: Baseline 19.4 ± 6.3; 12 mth -4.8 (no SD)<br>Placebo: Baseline 17.4 ± 6.8; 12 mth -3.3 (no SD)<br><br>Max urinary flow (mL/s):<br>Fin: Baseline 7.6 ± 2.4; 12 mth +1.0 ± 2.5<br>Placebo: Baseline 7.1 ± 2.0; 12 mth -0.1 ± 1.5<br><br>Free flow max (mL/s):<br>Fin: Baseline 10.0 ± 4.2; 12 mth +2.0 ± 5.8<br>Placebo: Baseline 9.1 ± 3.7; 12 mth -0.5 ± 2.7<br><br>Prostate volume (cc):<br>Fin: Baseline 45.1; 12 mth -8.9<br>Placebo: Baseline 44.8; 12 mth +1.8                                                                                                                                                                                                                                                                                                     | Symptom score (AUA):<br>Fin: Baseline 19.4 ± 6.3; 12 mth 14.6<br>Placebo: Baseline 17.4 ± 6.8; 12 mth 14.1<br>Max urinary flow (mL/s):<br>Fin: Baseline 7.6 ± 2.4; 12 mth 8.6<br>Placebo: Baseline 7.1 ± 2.0; 12 mth 7.0<br>Free flow max (mL/s):<br>Fin: Baseline 10.0 ± 4.2; 12 mth 12.0<br>Placebo: Baseline 9.1 ± 3.7; 12 mth 9.05<br>Prostate volume (cc):<br>Fin: Baseline 45.1; 12 mth 36.2<br>Placebo: Baseline 44.8; 12 mth 46.6                                                                                                                                                                                                            | Mean change from baseline at 12 mth:<br>Maximum urinary flow rate:<br>Prostate >40 cc (large):<br>-1.6 (95% CI 0.2 to 3.0)<br>Prostate <40 cc (small):<br>+0.7 (95% CI -0.6 to 2.0) | No data                                                                                                                                                               | Total:<br>Finasteride (12)<br>Placebo (3)<br>Adverse events:<br>Finasteride (3)<br>Placebo (3)<br>Lack of efficacy:<br>None                                                                                             | No data                       | R=1<br>DB=1<br>W=1 |
| Andersen et al, 1995    | BPH       | Multicentre, randomised, double blind, parallel group, placebo control. 1 mth single blind placebo run-in before randomisation. Assessments at baseline, 12 & 24 mth with additional 4 mthly visits.                                                                                | Double   | Moderate Enlarged prostate by DRE<br>Age ≤80<br>Max urinary flow rate ≥5 & ≤15 cc/s at screening.                                                                              | 707 patients enrolled<br>Mean age 65.5 yrs (range 46-80)                                                                                                           | 5 mg (n=353)<br>Completed (287)   | Placebo (n=354)<br>Completed (290) | 24 months | Total Boyarsky symptom score (0-54):<br>Fin: Baseline 13.4; 3 mth -1.0; 6 mth -1.3; 12 mth -1.5; 18 mth -1.9; 24 mth -2.0 (95% CI -2.6 to -1.3)<br>Placebo: Baseline 13.1; 3 mth -0.6; 6 mth -0.5; 12 mth -0.3; 18 mth 0.0; 24 mth 0.2 (CI -0.7 to 0.3)<br><br>Max urinary flow rate (mL/s):<br>Fin: Baseline 10.2; 3 mth 1.0; 6 mth 1.5; 12 mth 1.4; 18 mth 1.6; 24 mth 1.5 (CI 1.1 to 1.9)<br>Placebo: Baseline 10.5; 3 mth 0.4; 6 mth 0.25; 12 mth -0.1; 18 mth 0.5; 24 mth -0.3 (CI 0.7 to 0.0)<br><br>Mean urinary flow rate (mL/s):<br>Fin: Baseline 5.2; 24 mth 0.6 (CI 0.4 to 0.9)<br>Placebo: Baseline 5.5; 24 mth -0.3 (CI -0.5 to -0.1)<br><br>Prostate volume:<br>Fin: Baseline 40.6; 24 mth -7.8 (-19.2%, CI -22.4 to -15.9)<br>Placebo: Baseline 41.7; 24 mth -4.8 (-11.5%, CI 4.8 to 18.1) | Total Boyarsky symptom score (0-54):<br>Fin: Baseline 13.4; 3 mth 12.4; 6 mth 12.1; 12 mth 11.9; 18 mth 11.6; 24 mth 11.4<br>Placebo: Baseline 13.1; 3 mth 12.5; 6 mth 12.5; 12 mth 12.8; 18 mth 13.4; 24 mth 13.3<br><br>Max urinary flow rate (mL/s):<br>Fin: Baseline 10.2; 3 mth 11.2; 6 mth 11.7; 12 mth 11.6; 18 mth 11.8; 24 mth 11.7<br>Placebo: Baseline 10.5; 3 mth 10.9; 6 mth 10.75; 12 mth 10.4; 18 mth 10.7; 24 mth 10.2<br><br>Mean urinary flow rate (mL/s):<br>Fin: Baseline 5.2; 24 mth 5.8<br>Placebo: Baseline 5.5; 24 mth 5.2<br><br>Prostate volume:<br>Fin: Baseline 40.6; 24 mth 32.8<br>Placebo: Baseline 41.7; 24 mth 36.9 | No data                                                                                                                                                                             | No differences between groups except for sexual dysfunction.<br><br>Sexual dysfunction:<br>Fin (55)<br>Placebo (30)                                                   | Total discontinued:<br>Finasteride (66)<br>Placebo (64)<br><br>Discontinued because of adverse events:<br>Finasteride (39)<br>Placebo (30)<br><br>Discontinued because of lack of efficacy:<br>Fin (13)<br>Placebo (22) | No data                       | R=1<br>DB=1<br>W=1 |
| Beisland HO et al, 1992 | BPH       | Multicentre, randomised, double blind, parallel group, placebo control with open label extension. 1 mth single blind placebo run-in before randomisation. Double blind: 24 wks. Assessments at baseline, 12, 24 wks<br>Open label: Additional 12-18 mth on finasteride. No washout. | Double   | Enlarged prostate (palpation)<br>Symptoms of urinary obstruction<br>Max urinary flow <15 mL/s                                                                                  | Number patients enrolled: 182<br><br>Number patients completed: 168<br><br>45% of patients in each group had mild symptoms.<br><br>Mean age 67 years (range 46-80) | 5 mg (n=94)                       | Placebo (n=88)                     | 6 months  | Total Boyarsky symptom score (0-36):<br>Fin: 8.8 ± 6.1; 12 wks -2.0; 24 wks -2.5<br>Placebo: 7.8 ± 4.9; 12 wks -0.7; 24 wks -1.2<br><br>Obstructive symptom score:<br>Fin: 2.2 ± 4.0; 12 wks -1.6; 24 wks -2.0<br>Placebo: 1.1 ± 3.3; 12 wks -0.6; 24 wks 0.7<br><br>Max urinary flow rate (mL/s):<br>Fin: Baseline 8.0 ± 3.0; 12 wks 1.1; 24 wks 1.6<br>Placebo: Baseline 7.6 ± 3.1; 12 wks 0.7; 24 wks 1.1<br><br>Median prostate volume (cm3):<br>Fin: 44.2 ± 22.4; 24 wks -9.9 (22.5%)<br>Placebo: 43.8 ± 24.1; 24 wks -0.4 (1.0%)                                                                                                                                                                                                                                                                    | Total Boyarsky symptom score (0-36; 12 wks):<br>Fin: 8.8 ± 6.1; 12 wks 6.8; 24 wks 6.3<br>Placebo: 7.8 ± 4.9; 12 wks 7.1; 24 wks 6.6<br><br>Obstructive symptom score:<br>Fin: 2.2 ± 4.0; 12 wks 0.6; 24 wks 0.2<br>Placebo: 1.1 ± 3.3; 12 wks 0.5; 24 wks 1.8<br><br>Max urinary flow rate (mL/s):<br>Fin: Baseline 8.0 ± 3.0; 12 wks 9.1; 24 wks 9.6<br>Placebo: Baseline 7.6 ± 3.1; 12 wks 8.3; 24 wks 8.7<br><br>Median prostate volume (cm3):<br>Fin: 44.2 ± 22.4; 24 wks 34.3<br>Placebo: 43.8 ± 24.1; 24 wks 43.4                                                                                                                             | Number with ≥20% shrinkage in prostate volume at 24 wks:<br>Fin (50)<br>Placebo (16)                                                                                                | Serious:<br>Fin (10)<br>Placebo (1)<br>One drug-related<br><br>Sexual dysfunction (drug-related):<br>Fin (6)<br>Placebo (4)<br><br>Headache<br>Fin (9)<br>Placebo (6) | Total discontinued:<br>Fin (6)<br>Placebo (3)<br><br>Discontinued because of adverse events:<br>Fin (6)<br>Placebo (1)<br><br>Discontinued because of lack of efficacy:<br>No data                                      | No data                       | R=1<br>DB=1<br>W=1 |

| Author               | Condition | Methods                                                                                                                                                                                                                                                                                                                                                      | Blinding | Baseline entry criteria                                                                                      | Patients                                                                                                                                                                                                                                                                      | Finasteride Daily dose (mg) | Control                                                            | Duration  | Efficacy outcomes Mean change from baseline                                                                                                                                                                                                                                                                                                                                                                                                                                                                                                                                                          | Efficacy outcomes Absolute values                                                                                                                                                                                                                                                                                                                                                                                                                                                                                                                                                                                                                    | Efficacy according to prostate size: finasteride | Adverse events                                                                                                                                                                                                                                                                                                                                                                                     | Discontinuations                                                                                                                                                                                                                                       | AUR, surgery, prostate cancer                                                                                                                                                                                                                                               | Quality score      |
|----------------------|-----------|--------------------------------------------------------------------------------------------------------------------------------------------------------------------------------------------------------------------------------------------------------------------------------------------------------------------------------------------------------------|----------|--------------------------------------------------------------------------------------------------------------|-------------------------------------------------------------------------------------------------------------------------------------------------------------------------------------------------------------------------------------------------------------------------------|-----------------------------|--------------------------------------------------------------------|-----------|------------------------------------------------------------------------------------------------------------------------------------------------------------------------------------------------------------------------------------------------------------------------------------------------------------------------------------------------------------------------------------------------------------------------------------------------------------------------------------------------------------------------------------------------------------------------------------------------------|------------------------------------------------------------------------------------------------------------------------------------------------------------------------------------------------------------------------------------------------------------------------------------------------------------------------------------------------------------------------------------------------------------------------------------------------------------------------------------------------------------------------------------------------------------------------------------------------------------------------------------------------------|--------------------------------------------------|----------------------------------------------------------------------------------------------------------------------------------------------------------------------------------------------------------------------------------------------------------------------------------------------------------------------------------------------------------------------------------------------------|--------------------------------------------------------------------------------------------------------------------------------------------------------------------------------------------------------------------------------------------------------|-----------------------------------------------------------------------------------------------------------------------------------------------------------------------------------------------------------------------------------------------------------------------------|--------------------|
| Byrnes et al, 1995   | BPH       | Double blind, randomised, placebo controlled trial. Men attending community-based urology clinics for treatment of BPH. 1 mth single-blind placebo run-in. Patients with Moderate/severe symptoms at end of run-in & more than 80% compliance were randomised. Study visits were at 3 mth intervals. AUA symptom score. Compliance assessed by tablet count. | Double   | Moderate / severe (1.9% pts had mild symptoms with finasteride & 2.2% with placebo) Enlarged prostate on DRE | 2917 patients enrolled. Efficacy population: 2342 Safety population: 2417<br><br>Aged ≥45 years<br>Mainly Caucasian<br>Clinical diagnosis of BPH with prostate enlargement.                                                                                                   | 5 mg (n=1821)               | Placebo (n=596)                                                    | 12 months | AUA symptom score:<br>Fin: Baseline not provided 3 mth -3.4; 6 mth -4.2; 9 mth -4.3; 12 mth -4.8<br>Placebo: Baseline not provided; 3 mth -2.5; 6 mth -3.3; 9 mth -3.2; 12 mth -3.3                                                                                                                                                                                                                                                                                                                                                                                                                  | Baseline not provided - no data                                                                                                                                                                                                                                                                                                                                                                                                                                                                                                                                                                                                                      | No data                                          | Any AE:<br>Fin (57.9%, 920)<br>Placebo (58.6%, 349)<br><br>Serious AE:<br>Fin (11.6%, 211)<br>Placebo (12.2%, 73)<br><br>Impotence:<br>Fin (6.8%, 124)<br>Placebo (3.2%, 19)<br><br>Libido decrease:<br>Fin (3.1%, 49)<br>Placebo (1.2%, 7)<br><br>Ejaculation disorder:<br>Fin (2.3%, 37)<br>Placebo (0.5%, 3)<br><br>Sexual dysfunction at baseline:<br>Fin (36.6%, 666)<br>Placebo (33.7%, 201) | Total discontinued:<br>Fin (9.4%, 171)<br>Placebo (20.5%, 122)<br><br>Discontinuation because of adverse effects:<br>Fin (5.7%, 104)<br>Placebo (4.7%, 28)<br><br>Discontinuation because of lack of efficacy:<br>Fin (3.5%, 64)<br>Placebo (4.0%, 24) | TURP-total:<br>Fin (1.6%, 29)<br>Placebo (1.3%, 8)<br><br>Acute urinary retention:<br>Fin (0.6%, 11)<br>Placebo (0.7%, 4)<br><br>Worsening of BPH/lack of improvement:<br>Fin (1.0%, 18)<br>Placebo (0.7%, 4)<br><br>Prostate cancer:<br>Fin (0.3%, 5)<br>Placebo (0.3%, 2) | R=1<br>DB=1<br>W=1 |
| Carraro et al, 1996  | BPH       | Randomised, double blind, active controlled trial, parallel groups. Assessments at baseline, 6, 13 & 26 wks by same investigator. AUA symptom score.                                                                                                                                                                                                         | Double   | AUA ≥6, urinary flow 4-15 mL/s<br>Clinical BPH by DRE                                                        | 1098 randomised<br><br>Completed trial: 951 (Fin 484, permixon 467)<br><br>Mean age 64 years (range 49-88)<br><br>Mean body mass index: 26 (range 17-38)                                                                                                                      | 5 mg (n=545)                | Permixon (serenoa repens) (n=553)                                  | 26 weeks  | AUA symptom score:<br>Fin: Baseline 15.7 ±5.7; 6 wks -3.5; 13 wks -5.2; 26 wks -6.2<br>Permixon: Baseline 15.7 ±5.8; 6 wks -3.4; 13 wks -4.7; 26 wks -5.8<br><br>Max urinary flow rate (mL/s):<br>Fin: Baseline 10.8 ±2.8; 6 wks 1.7 (16%); 13 wks 2.4 (22%); 26 wks 3.34 (30%)<br>Permixon: Baseline 10.6 ±2.8; 6 wks 1.6 (15%); 13 wks 2.1 (19.5%); 26 wks 2.7 (25%)<br><br>Prostate volume (ml):<br>Fin: Baseline 44.0 ±20.6; 6 wks no data; 13 wks 37.0; 26 wks 37.0<br>Permixon: Baseline 43.0 ±19/6; 6 wks no data; 13 wks -40.0; 26 wks -40.0                                                 | AUA symptom score:<br>Fin: Baseline 15.7 ±5.7; 6 wks 12.2; 13 wks 10.5; 26 wks 9.5 ±5.5<br>Permixon: Baseline 15.7 ±5.8; 6 wks 12.3; 13 wks 11.0; 26 wks 9.9 ±5.4<br><br>Max urinary flow rate (mL/s):<br>Fin: Baseline 10.8 ±2.8; 6 wks 12.5; 13 wks 13.2; 26 wks 14.0 ±7.4<br>Permixon: Baseline 10.6 ±2.8; 6 wks 12.2; 13 wks 12.7; 26 wks 13.3 ±6.7<br><br>Prostate volume (ml):<br>Fin: Baseline 44.0 ±20.6; 6 wks no data; 13 wks 36.96; 26 wks 36.96<br>Permixon: Baseline 43.0 ±19/6; 6 wks no data; 13 wks 39.99; 26 wks 39.99                                                                                                              | No data                                          | Decreased libido:<br>Fin (3.0%, 16)<br>Permixon (2.2%, 12)<br><br>Impotence:<br>Fin (2.8%, 15)<br>Permixon (1.5%, 8)<br><br>Ejaculatory disorder:<br>None reported                                                                                                                                                                                                                                 | Total discontinued:<br>Fin (61)<br>Permixon (86)<br><br>Discontinued because of adverse effects:<br>Fin (14)<br>Permixon (28)<br><br>Discontinued because of lack of efficacy:<br>Fin (2)<br>Permixon (0)                                              | Urinary retention:<br>Fin (0.6%, 3)<br>Permixon (1.3%, 7)                                                                                                                                                                                                                   | R=2<br>DB=1<br>W=1 |
| Debruyne et al, 1998 | BPH       | Randomised, double blind, active controlled trial, multicentre, parallel groups, 2 wk single blind, placebo run-in. Assessments at baseline, 1, 3 & 6 mth. AUA symptom score.                                                                                                                                                                                | Double   | AUA score ≥7<br>Qmax between 5-15 mL/s<br>No threshold for prostate volume                                   | Randomised: 1051 patients.<br>Completed study: 918<br><br>Aged 50-75 years<br>LUTS related to BPH. 46% aged over 65 years.<br><br>32% had concomitant treated hypertension.<br><br>9% mild, 78% moderate, 21% severe at baseline<br><br>Duration of symptoms: about 3.5 years | 5 mg (n=344)                | Alfuzosin 10 mg daily (n=358)<br>Combination (n=349)<br>No placebo | 6 months  | AUA total symptom score:<br>Fin: Baseline 15.5 ±5.2; 3 mth -4.5; 6 mth -5.2 ±5.7<br>Alf: Baseline 15.3 ±5.5; 3 mth -5.3; 6 mth -6.3 ±5.8<br>Combination: Baseline 15.6 ±5.7; 3 mth -5.8; 6 mth -6.1 ±5.6<br><br>Max urinary flow rate (mL/s):<br>Fin: Baseline 9.8 ±2.6; 3 mth 1.8; 6 mth 1.8 ±4.5<br>Alf: Baseline 9.7 ±2.8; 3 mth 2.1; 6 mth 1.8 ±3.8<br>Combination: Baseline 10.1 ±3.5; 3 mth 2.4; 6 mth 2.3 ±4.7<br><br>Prostate volume (ml):<br>Fin: Baseline 40.9 ±23.5; 6 mth -4.3 ±15.0<br>Alf: Baseline 41.4 ±25.7; 6 mth -0.2 ±14.3<br>Combination: Baseline 41.1 ±22.6; 6 mth -4.9 ±12.4 | AUA total symptom score:<br>Fin: Baseline 15.5 ±5.2; 3 mth 11.0; 6 mth 10.3<br>Alf: Baseline 15.3 ±5.5; 3 mth 10.0; 6 mth 9.0<br>Combination: Baseline 15.6 ±5.7; 3 mth 9.8; 6 mth 9.5<br><br>Max urinary flow rate (mL/s):<br>Fin: Baseline 9.8 ±2.6; 3 mth 8.0; 6 mth 8.0<br>Alf: Baseline 9.7 ±2.8; 3 mth 7.6; 6 mth 7.9<br>Combination: Baseline 10.1 ±3.5; 3 mth 12.5; 6 mth 12.4<br><br>Prostate volume (ml):<br>Fin: Baseline 40.9 ±23.5; 6 mth 36.3<br>Alf: Baseline 41.4 ±25.7; 6 mth 41.2<br>Combination: Baseline 41.1 ±22.6; 6 mth 36.2<br><br>% with ≥50% improvement in symptoms at 6 mth:<br>Fin: 33%<br>Alf: 43%<br>Combination: 42% | No data                                          | Any adverse effect:<br>Fin (26%, 89)<br>Alf (27%, 97)<br>Combination (26%, 91)<br><br>Serious adverse effects:<br>Fin (2.9%, 10)<br>Alf (1.7%, 6)<br>Combination (2.3%, 8)<br><br>Ejaculation failure:<br>Fin (5)<br>Alf (0)<br>Combination (3)<br><br>Impotence:<br>Fin (22)<br>Alf (8)<br>Combination (26)<br><br>Libido decreased:<br>Fin (6)<br>Alf (2)<br>Combination (7)                     | Total discontinued:<br>Fin (39)<br>Alf (40)<br>Combination (54)<br><br>Discontinued because of adverse effects:<br>Fin (18)<br>Alf (25)<br>Combination (24)<br><br>Discontinued because of lack of efficacy:<br>Fin (2)<br>Alf (3)<br>Combination (2)  | AUR:<br>Fin (2)<br>Alf (3)<br>Combination (2)                                                                                                                                                                                                                               | R=1<br>DB=1<br>W=1 |

| Author                        | Condition                         | Methods                                                                                                                                                                                         | Blinding         | Baseline entry criteria                                                                                                                                                 | Patients                                                                                                                                                                                                                          | Finasteride Daily dose (mg)  | Control         | Duration  | Efficacy outcomes Mean change from baseline                                                                                                                                                                                                                                                                                                                                                                                                                                                                                                                                                                                                                                                                                                                                                                                                                                                                                               | Efficacy outcomes Absolute values                                                                                                                                                                                                                                                                                                                                                                                                                                                                                                                                                                                                                                                                                                                                                                                                                                                   | Efficacy according to prostate size: finasteride | Adverse events                                                                                                                                                                                                                                                                                                                                                        | Discontinuations                                                                                                                                                                                                                                                         | AUR, surgery, prostate cancer                                                                                                                           | Quality score      |
|-------------------------------|-----------------------------------|-------------------------------------------------------------------------------------------------------------------------------------------------------------------------------------------------|------------------|-------------------------------------------------------------------------------------------------------------------------------------------------------------------------|-----------------------------------------------------------------------------------------------------------------------------------------------------------------------------------------------------------------------------------|------------------------------|-----------------|-----------|-------------------------------------------------------------------------------------------------------------------------------------------------------------------------------------------------------------------------------------------------------------------------------------------------------------------------------------------------------------------------------------------------------------------------------------------------------------------------------------------------------------------------------------------------------------------------------------------------------------------------------------------------------------------------------------------------------------------------------------------------------------------------------------------------------------------------------------------------------------------------------------------------------------------------------------------|-------------------------------------------------------------------------------------------------------------------------------------------------------------------------------------------------------------------------------------------------------------------------------------------------------------------------------------------------------------------------------------------------------------------------------------------------------------------------------------------------------------------------------------------------------------------------------------------------------------------------------------------------------------------------------------------------------------------------------------------------------------------------------------------------------------------------------------------------------------------------------------|--------------------------------------------------|-----------------------------------------------------------------------------------------------------------------------------------------------------------------------------------------------------------------------------------------------------------------------------------------------------------------------------------------------------------------------|--------------------------------------------------------------------------------------------------------------------------------------------------------------------------------------------------------------------------------------------------------------------------|---------------------------------------------------------------------------------------------------------------------------------------------------------|--------------------|
| Finasteride study group, 1993 | BPH                               | Multicentre, randomised, double blind, placebo controlled, parallel groups. 2-wk placebo run-in. Periodic assessments. Boyarsky symptom scale                                                   | Double           | Symptoms or urinary obstruction<br>Voided vol $\geq$ 150 ml only included in analysis<br>Max urinary flow rate $<$ 15 mL/s<br>Prostate volume $\geq$ 30 cm <sup>3</sup> | Baseline total symptom score: 18 $\pm$ 6.5 (moderate)<br><br>Mean age: 66 yrs (range 46-83)<br><br>Mean prostate volume (cm <sup>3</sup> ):<br>Fin 1 mg: 47.5 $\pm$ 22.5<br>Fin 5 mg: 47.0 $\pm$ 20.8<br>Placebo: 46.3 $\pm$ 23.4 | 1 mg (n=249)<br>5 mg (n=246) | Placebo (n=255) | 12 months | Boyarsky total symptom score:<br>Fin 1 mg: Baseline 18.7 $\pm$ 6.0; 3 mth -2.2; 6 mth -2.9; 9 mth -2.8; 12 mth -2.7<br>Fin 5 mg: Baseline 18.6 $\pm$ 6.0; 3 mth -2.5; 6 mth -3.1; 9 mth -3.4; 12 mth -3.4<br>Placebo: Baseline 18.2 $\pm$ 5.9; 3 mth -1.9; 6 mth -2.2; 9 mth -2.1; 12 mth -2.0<br><br>Max urinary flow rate (mL/s):<br>Fin 1 mg: Baseline 8.8 $\pm$ 3.7; 3 mth 0.75; 6 mth 1.6; 9 mth 1.6; 12 mth 1.8<br>Fin 5 mg: Baseline 9.2 $\pm$ 4.0; 3 mth 1.0; 6 mth 1.2; 9 mth 1.25; 12 mth 1.4<br>Placebo: Baseline 8.6 $\pm$ 3.4; 3 mth 0.2; 6 mth 0.75; 9 mth 0.4; 12 mth 0.4<br><br>Prostate volume (cm <sup>3</sup> ) median:<br>Fin 1 mg: Baseline 47.5 $\pm$ 22.5; 3 mth -7.6 (-16%); 6 mth -6.65 (-14%); 12 mth -11.4 (-24%)<br>Fin 5 mg: Baseline 47.0 $\pm$ 20.8; 3 mth -8.9 (-19%); 6 mth -9.9 (-21%); 12 mth -10.3 (-22%)<br>Placebo: Baseline 46.3 $\pm$ 23.4; 3 mth -2.3 (-5%); 6 mth -1.8 (-4%); 12 mth -1.8 (-4%) | Median Boyarsky symptom score:<br>Fin 1 mg: Baseline 18.7 $\pm$ 6.0; 3 mth 16.5; 6 mth 15.8; 9 mth 15.9; 12 mth 16.0<br>Fin 5 mg: Baseline 18.6 $\pm$ 6.0; 3 mth 16.1; 6 mth 15.5; 9 mth 15.2; 12 mth 15.2<br>Placebo: Baseline 18.2 $\pm$ 5.9; 3 mth 16.3; 6 mth 16.0; 9 mth 16.1; 12 mth 16.2<br><br>Max urinary flow rate (mL/s):<br>Fin 1 mg: Baseline 8.8 $\pm$ 3.7; 3 mth 9.55; 6 mth 10.46; 9 mth 10.4; 12 mth 10.6<br>Fin 5 mg: Baseline 9.2 $\pm$ 4.0; 3 mth 10.2; 6 mth 10.4; 9 mth 10.45; 12 mth 10.6<br>Placebo: Baseline 8.6 $\pm$ 3.4; 3 mth 8.8; 6 mth 9.35; 9 mth 9.0; 12 mth 9.0<br><br>Prostate volume (cm <sup>3</sup> ) median:<br>Fin 1 mg: Baseline 47.5 $\pm$ 22.5; 3 mth 39.9; 6 mth 41.0; 12 mth 36.1<br>Fin 5 mg: Baseline 47.0 $\pm$ 20.8; 3 mth 38.1; 6 mth 37.1; 12 mth 39.7<br>Placebo: Baseline 46.3 $\pm$ 23.4; 3 mth 44.0; 6 mth 44.5; 12 mth 44.5 | No data                                          | Impotence:<br>Fin 1 mg (10; 4.0%)<br>Fin 5 mg (12; 4.9%)<br>Placebo (1; 0.4%)<br><br>No other data presented. Rate of adverse effects was similar between groups. Most impotence was of mild-moderate severity                                                                                                                                                        | Fin 5 mg: 1 patient withdrew because of impotence.<br>No other data provided on withdrawals.                                                                                                                                                                             | Prostate surgery for BPH:<br>Fin 1 mg (1)<br>Fin 5 mg (3)<br>Placebo (4)<br><br>Acute urinary retention:<br>Fin 1 mg (2)<br>Fin 5 mg (3)<br>Placebo (3) | R=1<br>DB=1<br>W=1 |
| Gormley et al, 1992           | BPH                               | Randomised, double blind, placebo controlled, parallel groups. 1 mth single blind placebo run-in. Assessed mthly by same investigator. Compliance rated by tablet count. Boyarsky symptom scale | Double then open | Enlarged prostate on DRE<br>Symptoms of urinary obstruction<br>max urinary flow rate $\leq$ 15 mL/s, voided volume $\geq$ 150 ml                                        | Completed trial (12 mth):<br>Fin 1 mg (270)<br>Fin 5 mg (257)<br>Placebo (263)<br>Mean age: 64 years (range 40-83)<br>Mainly Caucasian                                                                                            | 1 mg (n=298)<br>5 mg (n=297) | Placebo (n=300) | 12 months | Boyarsky symptom score:<br>Fin 1 mg: Baseline 10.6 $\pm$ 5.7; 3 mth -1.4; 6 mth -1.8; 9 mth -1.7; 12 mth -1.6 (-9%)<br>Fin 5 mg: Baseline 10.2 $\pm$ 5.5; 3 mth -1.95; 6 mth -1.95; 9 mth -1.9; 12 mth -2.3 (-21%)<br>Placebo: Baseline 9.8 $\pm$ 5.3; 3 mth -1.5; 6 mth -1.25; 9 mth -1.2; 12 mth -1.0 (-2%)<br><br>Max urinary flow rate (mL/s):<br>Fin 1 mg: Baseline 10.6 $\pm$ 5.7; 3 mth 1.8; 6 mth 1.9; 9 mth 2.1; 12 mth 2.1 (23%)<br>Fin 5 mg: Baseline 10.2 $\pm$ 5.5; 3 mth 2.0; 6 mth 1.9; 9 mth 2.5; 12 mth 2.7 (22%)<br>Placebo: Baseline 9.8 $\pm$ 5.3; 3 mth 0.2; 6 mth 0.1; 9 mth 0.3; 12 mth 0.2 (8%)<br><br>Prostate volume (ml):<br>Fin 1 mg: Baseline 60.9 $\pm$ 34.3; 12 mth -10.2<br>Fin 5 mg: Baseline 58.6 $\pm$ 30.5; 12 mth -11.1<br>Placebo: Baseline 61.0 $\pm$ 36.5; 12 mth -11.2                                                                                                                           | Boyarsky symptom score:<br>Fin 1 mg: Baseline 10.6 $\pm$ 5.7; 3 mth 9.2; 6 mth 8.8; 9 mth 8.9; 12 mth 9.0<br>Fin 5 mg: Baseline 10.2 $\pm$ 5.5; 3 mth 8.25; 6 mth 8.25; 9 mth 8.3; 12 mth 7.7<br>Placebo: Baseline 9.8 $\pm$ 5.3; 3 mth 8.3; 6 mth 8.55; 9 mth 8.6; 12 mth 8.8<br><br>Max urinary flow rate (mL/s):<br>Fin 1 mg: Baseline 10.6 $\pm$ 5.7; 3 mth 12.4; 6 mth 12.5; 9 mth 12.7; 12 mth 12.7<br>Fin 5 mg: Baseline 10.2 $\pm$ 5.5; 3 mth 12.2; 6 mth 12.1; 9 mth 12.7; 12 mth 12.9<br>Placebo: Baseline 9.8 $\pm$ 5.3; 3 mth 10.0; 6 mth 9.9; 9 mth 10.1; 12 mth 10.0<br><br>Prostate volume (ml):<br>Fin 1 mg: Baseline 60.9 $\pm$ 34.3; 12 mth 49.1 $\pm$ 26.6<br>Fin 5 mg: Baseline 58.6 $\pm$ 30.5; 12 mth 47.5 $\pm$ 23.6<br>Placebo: Baseline 61.0 $\pm$ 36.5; 12 mth 59.8 $\pm$ 39.4                                                                            | No data                                          | Ejaculatory disorder:<br>Fin 1 mg (4.4%, 13)<br>Fin 5 mg (4.4%, 13)<br>Placebo (1.7%, 5)<br><br>Impotence:<br>Fin 1 mg (5.0%, 15)<br>Fin 5 mg (3.4%, 10)<br>Placebo (1.7%, 5)<br><br>Orgasm dysfunction:<br>Fin 1 mg (0.3%, 9)<br>Fin 5 mg (0.7%, 2)<br>Placebo (0.3%, 1)<br><br>Decreased libido:<br>Fin 1 mg (6.0%, 18)<br>Fin 5 mg (4.7%, 14)<br>Placebo (1.3%, 4) | Total discontinued:<br>Fin 1 mg (28)<br>Fin 5 mg (40)<br>Placebo (37)<br><br>Discontinued because of adverse effects:<br>Fin 1 mg (14)<br>Fin 5 mg (16)<br>Placebo (18)<br><br>Discontinued because of lack of efficacy:<br>Fin 1 mg (4)<br>Fin 5 mg (12)<br>Placebo (9) | TURP:<br>Fin 1 mg (4)<br>Fin 5 mg (3)<br>Placebo (3)<br><br>One man had a radical prostatectomy for prostate cancer                                     | R=1<br>DB=1<br>W=1 |
| Isotalo et al, 2001           | BPH plus acute urinary retention. | Patients were catheterised & had a stent implanted. Those able to void were randomised. Double blind, placebo controlled, parallel group trial. AUA symptom score.                              | Double           | Ability to void after catheterisation and stent implant. No further details.                                                                                            | 55 patients enrolled. 19 completed the trial.<br><br>AUR related to BPH<br><br>Mean age 71 years (range 52-89)<br><br>Mean prostatic volume by TRUS was 66 (17-150) ml.                                                           | 5 mg (n=26)<br>10 mg (n=16)  | Placebo (n=29)  | 18 mth    | AUA total symptom score:<br>No significant changes between or within groups. No further details.<br><br>Max urinary flow rate (mL/s):<br>Fin: Baseline 6.2; 6 mth 1.2; 12 mth 5.2; 18 mth 2.1<br>Placebo: Baseline 7.0; 6 mth -1.1; 12 mth 1.2; 18 mth 0.4<br><br>Prostate volume (ml):<br>Fin: Baseline 62; 6 mth no data; 12 mth -16; 18 mth -20<br>Placebo: Baseline 70; 6 mth no data; 12 mth -15; 18 mth -6                                                                                                                                                                                                                                                                                                                                                                                                                                                                                                                          | AUA total symptom score:<br>No significant changes between or within groups. No further details.<br><br>Max urinary flow rate (mL/s):<br>Fin: Baseline 6.2; 6 mth 7.4; 12 mth 11.4; 18 mth 8.3<br>Placebo: Baseline 7.0; 6 mth 5.9; 12 mth 8.2; 18 mth 7.6<br><br>Prostate volume (ml):<br>Fin: Baseline 62; 6 mth no data; 12 mth 46; 18 mth 42<br>Placebo: Baseline 70; 6 mth no data; 12 mth 55; 18 mth 64                                                                                                                                                                                                                                                                                                                                                                                                                                                                       | No data                                          | 4 AEs reported, other than urinary problems. None were sexual dysfunction.                                                                                                                                                                                                                                                                                            | Total discontinued:<br>Fin (18)<br>Placebo (18)<br><br>Discontinued because of adverse effects:<br>n=2*<br><br>Discontinued because of lack of efficacy:<br>n=29*<br><br>*not stated per group                                                                           | No data                                                                                                                                                 | R=1<br>DB=2<br>W=1 |
| Kirby et al, 1992             | BPH                               | Randomised, double blind, placebo controlled, parallel groups. 1 wk placebo run-in. Assessed mthly. Last observation carried forward for drop-outs (DB phase only). Boyarsky symptom scale      | Double           | Mean Boyarsky symptom score $\geq$ 8. Confirmed obstruction. Prostate volume by TRUS.                                                                                   | Outflow obstruction due to BPH<br>Mean age 64 years (range 48-87)                                                                                                                                                                 | 5 mg (n=29)<br>10 mg (n=16)  | Placebo (n=21)  | 3 mth     | Boyarsky total symptom score:<br>Fin 5 mg: Baseline 19.3; 3 mth -4.0<br>Fin 10 mg: Baseline 16.9; 3 mth -2.3<br>Placebo: Baseline 18.8; 3 mth -3.5<br><br>Max urinary flow rate (mL/s):<br>Fin 5 mg: Baseline 7.2; 3 mth 3.3<br>Fin 10 mg: Baseline 9.3; 3 mth 1.5<br>Placebo: Baseline 11.1; 3 mth 0.9<br><br>Prostate volume (cm <sup>3</sup> ):<br>Fin 5 mg: Baseline 49.7; 3 mth -2.3<br>fin 10 mg: Baseline 54.3; 3 mth -2.2<br>Placebo: Baseline 37.7; 3 mth -2.0                                                                                                                                                                                                                                                                                                                                                                                                                                                                   | Boyarsky total symptom score:<br>Fin 5 mg: Baseline 19.3; 3 mth 15.3<br>Fin 10 mg: Baseline 16.9; 3 mth 14.6<br>Placebo: Baseline 18.8; 3 mth 15.3<br><br>Max urinary flow rate (mL/s):<br>Fin 5 mg: Baseline 7.2; 3 mth 10.5<br>Fin 10 mg: Baseline 9.3; 3 mth 10.8<br>Placebo: Baseline 11.1; 3 mth 10.0<br><br>Prostate volume (cm <sup>3</sup> ):<br>Fin 5 mg: Baseline 49.7; 3 mth 47.4<br>fin 10 mg: Baseline 54.3; 3 mth 52.1<br>Placebo: Baseline 37.7; 3 mth 35.7                                                                                                                                                                                                                                                                                                                                                                                                          | No data                                          | Few and minor.<br><br>Fin 5 mg:<br>Chest infection (1)<br>Impotence (1)<br><br>Fin 10 mg:<br>Rash (1)                                                                                                                                                                                                                                                                 | Total discontinued:<br>12<br><br>Discontinued because of adverse effects:<br>4<br><br>No further details provided                                                                                                                                                        | No data                                                                                                                                                 | R=1<br>DB=2<br>W=1 |

| Author                                         | Condition                 | Methods                                                                                                                                                                                                                                            | Blinding | Baseline entry criteria                                                                                                                            | Patients                                                                                                                                                                                                                                                                                                                                        | Finasteride Daily dose (mg) | Control                                                           | Duration  | Efficacy outcomes Mean change from baseline                                                                                                                                                                                                                                                                                                                                                                                                                                                                                                                                                                                                                                                               | Efficacy outcomes Absolute values                                                                                                                                                                                                                                                                                                                                                                                                                                                                                                                                                                                                                                                               | Efficacy according to prostate size: finasteride                                                                                                                                                                                                                   | Adverse events                                                                                                                                                                                                                                                                                                                             | Discontinuations                                                                                                                                                                                                                                                   | AUR, surgery, prostate cancer                                                                                                                             | Quality score      |
|------------------------------------------------|---------------------------|----------------------------------------------------------------------------------------------------------------------------------------------------------------------------------------------------------------------------------------------------|----------|----------------------------------------------------------------------------------------------------------------------------------------------------|-------------------------------------------------------------------------------------------------------------------------------------------------------------------------------------------------------------------------------------------------------------------------------------------------------------------------------------------------|-----------------------------|-------------------------------------------------------------------|-----------|-----------------------------------------------------------------------------------------------------------------------------------------------------------------------------------------------------------------------------------------------------------------------------------------------------------------------------------------------------------------------------------------------------------------------------------------------------------------------------------------------------------------------------------------------------------------------------------------------------------------------------------------------------------------------------------------------------------|-------------------------------------------------------------------------------------------------------------------------------------------------------------------------------------------------------------------------------------------------------------------------------------------------------------------------------------------------------------------------------------------------------------------------------------------------------------------------------------------------------------------------------------------------------------------------------------------------------------------------------------------------------------------------------------------------|--------------------------------------------------------------------------------------------------------------------------------------------------------------------------------------------------------------------------------------------------------------------|--------------------------------------------------------------------------------------------------------------------------------------------------------------------------------------------------------------------------------------------------------------------------------------------------------------------------------------------|--------------------------------------------------------------------------------------------------------------------------------------------------------------------------------------------------------------------------------------------------------------------|-----------------------------------------------------------------------------------------------------------------------------------------------------------|--------------------|
| Lepor et al, 1996<br><br>VA cooperative study. | BPH                       | Randomised, double blind, parallel group, placebo control. Assessments at baseline, 9 & 12 months. 1 mth single blind placebo run-in. Compliance monitored by tablet count. AUA symptom score. Periodic assessments including 13, 26, 32 & 52 wks. | Double   | Voiding volume $\geq 150$ ml<br>No threshold for prostate enlargement. Measured using TRUS                                                         | 1229 patients enrolled.<br>Mean age: 65 yrs<br>Mean prostate volume (cm <sup>3</sup> ): 37<br>Mean total AUA symptom score: 16<br>Peak urinary flow rate (mL/s): 10.5<br><br>Completed 1 yr: Fin (243)<br>Terazosin (256)<br>Combination (254)<br>Placebo (254)                                                                                 | 5 mg (n=310)                | Placebo (n=305)<br>Terazosin 10 mg (n=305)<br>Combination (n=309) | 12 months | AUA total symptom score:<br>Fin: Baseline 16.2 $\pm$ 5.4; 12 mth -3.2<br>Terazosin: Baseline 16.2 $\pm$ 5.5; 12 mth -6.1<br>Combination: Baseline 15.9 $\pm$ 5.7; 12 mth -6.2<br>Placebo: Baseline 15.8 $\pm$ 5.5; 12 mth -2.6<br><br>Peak urinary flow rate at 4-52 wks:<br>Fin: Baseline 10.6 $\pm$ 2.5; 1.6<br>Terazosin: Baseline 10.5 $\pm$ 2.6; 2.7<br>Combination: Baseline 10.4 $\pm$ 2.7; 3.2<br>Placebo: Baseline 10.4 $\pm$ 2.6; 1.4<br><br>Prostate volume (cm <sup>3</sup> ):<br>Fin: Baseline 36.2 $\pm$ 1.0; 12 mth -6.1<br>Terazosin: Baseline 37.5 $\pm$ 1.1; 12 mth 0.5<br>Combination: Baseline 37.2 $\pm$ 1.1; 12 mth -7.0<br>Placebo: Baseline 38.4 $\pm$ 1.3; 12 mth +0.5           | AUA total symptom score:<br>Fin: Baseline 16.2 $\pm$ 5.4; 12 mth 13.0<br>Terazosin: Baseline 16.2 $\pm$ 5.5; 12 mth 10.1<br>Combination: Baseline 15.9 $\pm$ 5.7; 12 mth 9.7<br>Placebo: Baseline 15.8 $\pm$ 5.5; 12 mth 13.2<br><br>Peak urinary flow rate at 4-52 wks:<br>Fin: Baseline 10.6 $\pm$ 2.5; 12.2<br>Terazosin: Baseline 10.5 $\pm$ 2.6; 2.7<br>Combination: Baseline 10.4 $\pm$ 2.7; 3.2<br>Placebo: Baseline 10.4 $\pm$ 2.6; 11.8<br><br>Prostate volume (cm <sup>3</sup> ):<br>Fin: Baseline 36.2 $\pm$ 1.0; 12 mth 30.1<br>Terazosin: Baseline 37.5 $\pm$ 1.1; 12 mth 38<br>Combination: Baseline 37.2 $\pm$ 1.1; 12 mth 30.2<br>Placebo: Baseline 38.4 $\pm$ 1.3; 12 mth 38.9 | No data                                                                                                                                                                                                                                                            | Any AE:<br>No data<br><br>Impotence:<br>Fin (29); Placebo (14); Terazosin (18);<br>Combination (29)<br><br>Ejaculatory disorder:<br>Fin (6); Placebo (4);<br>Terazosin (1);<br>Combination (21)<br><br>Decreased libido:<br>Fin (14); Placebo (4);<br>Terazosin (8);<br>Combination (15)                                                   | Total discontinued:<br>Fin (67)<br>Terazosin (49)<br>Combination (55)<br>Placebo (51)<br><br>Discontinued because of adverse effects:<br>Fin (15)<br>Terazosin (18)<br>Combination (24)<br>Placebo (5)<br><br>Discontinued because of lack of efficacy:<br>No data | Need for surgery:<br>Fin (5)<br>Terazosin (2)<br>Combination (2)<br>Placebo (4)                                                                           | R=2<br>DB=1<br>W=1 |
| Lukkarinen et al, 1999                         | BPH post-balloon dilation | Randomised, double blind, placebo controlled, parallel groups. 4 wk placebo run-in. Assessed at 3, 6, 9, 12, 18 & 24 mth. Last observation carried forward for drop-outs (DB phase only). Boyarsky symptom scale                                   | Double   | Moderate to severe symptoms of BPH treated by balloon dilatation; 50% reduction in symptoms. Enlarged prostate on DRE & TRUS                       | Completed trial (24mth):<br>Fin (27)<br>Placebo (25)<br><br>Mean age: 65 years (range 50-82)                                                                                                                                                                                                                                                    | 5 mg (n=33)                 | Placebo (n=31)                                                    | 24 months | Total Boyarsky symptom score:<br>Fin: Baseline 7.0; 24 mth 3.2<br>Placebo: Baseline 7.0; 24 mth 4.4<br><br>Obstructive symptom score:<br>Fin: Baseline not provided; 24 mth 1.4<br>Placebo: Baseline not provided; 24 mth 2.6<br><br>Max urinary flow rate (mL/s):<br>Fin: Baseline 13.7 $\pm$ 6.1; 24 mth 0.2<br>Placebo: Baseline 13.3 $\pm$ 6.0; 24 mth -2.1<br><br>Prostate volume (cm <sup>3</sup> ):<br>Fin: Baseline 41.9 $\pm$ 9.8; 24 mth -13.1<br>Placebo: Baseline 46.7 $\pm$ 12.3; 24 mth -3.9                                                                                                                                                                                                | Total Boyarsky symptom score:<br>Fin: Baseline 7.0; 24 mth 10.2<br>Placebo: Baseline 7.0; 24 mth 11.4<br><br>Max urinary flow rate (mL/s):<br>Fin: Baseline 13.7 $\pm$ 6.1; 24 mth 13.9 $\pm$ 5.6<br>Placebo: Baseline 13.3 $\pm$ 6.0; 24 mth 11.2 $\pm$ 5.4<br><br>Prostate volume (cm <sup>3</sup> ):<br>Fin: Baseline 41.9 $\pm$ 9.8; 24 mth 28.8 $\pm$ 11.8<br>Placebo: Baseline 46.7 $\pm$ 12.3; 24 mth 42.8 $\pm$ 19.4                                                                                                                                                                                                                                                                    | No data                                                                                                                                                                                                                                                            | No data                                                                                                                                                                                                                                                                                                                                    | Total discontinued:<br>Fin (6)<br>Placebo (6)<br><br>Discontinued because of adverse effects:<br>Fin (3)<br>Placebo (3)<br><br>Discontinued because of lack of efficacy:<br>Fin (2)<br>Placebo (2)                                                                 | No data                                                                                                                                                   | R=1<br>DB=1<br>W=1 |
| Marbergher et al, 1998<br><br>PROWESS          | BPH                       | Multicentre, randomised, double blind, placebo controlled trial. Screening: 1.5 mth & 1 mth placebo run-in before randomisation. Compliance assessed by tablet count.                                                                              | Double   | Moderate symptoms (at least 2) Enlarged prostate on DRE                                                                                            | 3270 patients enrolled; 2902 randomised. Clinical diagnosis of BPH<br>Mean age 63 years (range 50-75)<br>Mean obstructive symptom score:<br>Fin: 9.3 $\pm$ 4.6<br>Placebo: 9.1 $\pm$ 4.5<br>Mean duration of BPH (yrs):<br>Fin: 3.19 $\pm$ 3.22<br>Placebo: 3.21 $\pm$ 3.27<br><br>Completed trial:<br>Fin (1119; 77.9%)<br>Placebo (1092; 75%) | 5 mg (n=1450)               | Placebo (n=1452)                                                  | 24 months | Total Boyarsky symptom score (0-54):<br>Fin: Baseline 14.5 $\pm$ 7.3; 3 mth -1.8; 6 mth -2.4; 12 mth -2.9; 18 mth -3.15; 24 mth -3.15<br>Placebo: Baseline 14.3 $\pm$ 7.2; 3 mth -1.2; 6 mth -1.8; 12 mth -1.85; 18 mth -1.7; 24 mth -1.5<br><br>Max urinary flow rate (mL/s):<br>Fin: Baseline 11.2 $\pm$ 5.9; 4 mth 0.9; 24 mth 1.4<br>Placebo: Baseline 10.9 $\pm$ 3.6; 4 mth 0.6; 24 mth 0.8<br><br>Prostate volume (cm <sup>3</sup> ):<br>Fin: Baseline 38.7 $\pm$ 20.1; 3 mth -1.6 (-4.0%); 6 mth -3.1 (-8%); 12 mth -4.6 (-12%); 18 mth -5.8 (-15%); 24 mth -5.8 (-15%)<br>Placebo: Baseline 39.2 $\pm$ 20.2; 3 mth 0.8 (2.0%); 6 mth 1.2 (3%); 12 mth 1.9 (5%); 18 mth 3.1 (8%); 24 mth 3.5 (+9%) | Total Boyarsky symptom score (0-54):<br>Fin: Baseline 14.5 $\pm$ 7.3; 3 mth 12.7; 6 mth 12.1; 12 mth 11.6; 18 mth 11.35; 24 mth 11.35<br>Placebo: Baseline 14.3 $\pm$ 7.2; 3 mth 14.1; 6 mth 12.5; 12 mth 12.45; 18 mth 12.6; 24 mth 12.8<br><br>Max urinary flow rate (mL/s):<br>Fin: Baseline 11.2 $\pm$ 5.9; 4 mth 12.1; 24 mth 12.6<br>Placebo: Baseline 10.9 $\pm$ 3.6; 4 mth 11.5; 24 mth 11.7<br><br>Prostate volume (cm <sup>3</sup> ):<br>Fin: Baseline 38.7 $\pm$ 20.1; 3 mth 37.1; 6 mth 35.6; 12 mth 31.0; 18 mth 32.8; 24 mth 30.5<br>Placebo: Baseline 39.2 $\pm$ 20.2; 3 mth 40.0; 6 mth 40.4; 12 mth 39.0; 18 mth 42.3; 24 mth 40.9                                             | Finasteride:<br>Prostate volume >40 cm <sup>3</sup> (n=394)<br>Prostate volume $\leq$ 40 cm <sup>3</sup> (n=680)<br><br>Trend for greater response in patients with prostates >40 cm <sup>3</sup> for total symptom score (placebo adjusted figures only provided) | 3168 patients available for safety analysis.<br>Any AE:<br>Fin (761); Placebo (786)<br><br>Serious AE:<br>Fin (149);<br>Placebo (186)<br><br>Death from AE:<br>Fin (16); Placebo (15)<br><br>Libido decreased:<br>Fin (63); Placebo (44)<br><br>Ejaculation disorder:<br>Fin (33) Placebo (9)<br><br>Impotence:<br>Fin (104); Placebo (74) | Total discontinued:<br>Fin (331)<br>Placebo (360)<br><br>Discontinued because of adverse effects:<br>Fin (108)<br>Placebo (137)<br><br>Discontinued because of lack of efficacy:<br>Fin (50)<br>Placebo (64)                                                       | Acute urinary retention / catheterisation at 24 mth:<br>Fin: 24 (1.7%)<br>Placebo: 54 (3.7%)<br><br>BPH related surgery at 24 mth:<br>Placebo: 111 (7.6%) | R=2<br>DB=2<br>W=1 |
| Marks et al, 1997                              | BPH + obstruction         | Randomised, double blind, placebo controlled, parallel groups. 1 mth single blind placebo run-in. Assessed at 6 wks, 3 & 6 mth. Nurse telephoned to determine compliance etc. AUA questionnaire                                                    | Double   | Symptomatic BPH (chronic symptoms of bladder outlet obstruction)<br>AUA $\geq 9$ (moderate / severe)<br>Prostate enlargement on rectal examination | Completed study:<br>Fin (26)<br>Placebo (13)<br><br>Mean age: 64 years (range 52-78)<br>Mainly Caucasian                                                                                                                                                                                                                                        | 5 mg (n=26)                 | Placebo (n=15)                                                    | 6 months  | Total IPSS symptom score:<br>Fin: Baseline 17.0 $\pm$ 5; 3 mth -6.0; 6 mth -7.0<br>Placebo: Baseline 16.0 $\pm$ 2; 3 mth -5.5; 6 mth -4.5<br><br>Max urinary flow rate (cc/s):<br>Fin: Baseline 13.0 $\pm$ 7; 3 mth 0.0; 6 mth 2.0<br>Placebo: Baseline 12.0 $\pm$ 5; 3 mth 2.5; 6 mth 4.0                                                                                                                                                                                                                                                                                                                                                                                                                | Total IPSS symptom score:<br>Fin: Baseline 17.0 $\pm$ 5; 3 mth 11.0; 6 mth 10.0, 6 mth 10.0<br>Placebo: Baseline 16.0 $\pm$ 2; 3 mth 10.5; 6 mth 11.5<br><br>Max urinary flow rate (cc/s):<br>Fin: Baseline 13.0 $\pm$ 7; 3 mth 13.0; 6 mth 15.0<br>Placebo: Baseline 12.0 $\pm$ 5; 3 mth 14.5; 6 mth 16.0                                                                                                                                                                                                                                                                                                                                                                                      | No data                                                                                                                                                                                                                                                            | No data                                                                                                                                                                                                                                                                                                                                    | Total discontinued:<br>Fin (0)<br>Placebo (2)                                                                                                                                                                                                                      | No data                                                                                                                                                   | R=1<br>DB=2<br>W=1 |

| Author                    | Condition | Methods                                                                                                                                                | Blinding | Baseline entry criteria                                                                                                      | Patients                                                                                                                                                                                      | Finasteride Daily dose (mg)                                                                        | Control                                                 | Duration                                      | Efficacy outcomes<br>Mean change from baseline                                                                                                                                                                                                                                                                                                                                                                                                                                                                                                                                                                                                                                                                                                                                                                                                                                                 | Efficacy outcomes<br>Absolute values                                                                                                                                                                                                                                                                                                                                                                                                                                                                                                                                                                                                                                                                                                                                                                                                     | Efficacy according to prostate size:<br>finasteride | Adverse events                                                                                                                                                                                                                                                                                                                                                                                      | Discontinuations                                                                                                                                                                                                                                                 | AUR, surgery, prostate cancer                                                                                                                                                                                    | Quality score      |
|---------------------------|-----------|--------------------------------------------------------------------------------------------------------------------------------------------------------|----------|------------------------------------------------------------------------------------------------------------------------------|-----------------------------------------------------------------------------------------------------------------------------------------------------------------------------------------------|----------------------------------------------------------------------------------------------------|---------------------------------------------------------|-----------------------------------------------|------------------------------------------------------------------------------------------------------------------------------------------------------------------------------------------------------------------------------------------------------------------------------------------------------------------------------------------------------------------------------------------------------------------------------------------------------------------------------------------------------------------------------------------------------------------------------------------------------------------------------------------------------------------------------------------------------------------------------------------------------------------------------------------------------------------------------------------------------------------------------------------------|------------------------------------------------------------------------------------------------------------------------------------------------------------------------------------------------------------------------------------------------------------------------------------------------------------------------------------------------------------------------------------------------------------------------------------------------------------------------------------------------------------------------------------------------------------------------------------------------------------------------------------------------------------------------------------------------------------------------------------------------------------------------------------------------------------------------------------------|-----------------------------------------------------|-----------------------------------------------------------------------------------------------------------------------------------------------------------------------------------------------------------------------------------------------------------------------------------------------------------------------------------------------------------------------------------------------------|------------------------------------------------------------------------------------------------------------------------------------------------------------------------------------------------------------------------------------------------------------------|------------------------------------------------------------------------------------------------------------------------------------------------------------------------------------------------------------------|--------------------|
| McConnell et al, 1998     | BPH       | Multicentre, randomised, double blind, placebo controlled, parallel groups. 1 mth single blind placebo run-in. Assessed every 4 mth. AUA symptom scale | Double   | Moderate/severe symptoms<br>Enlarged prostate on DRE<br>Mean prostate volume 55 +/-25 ml<br>Qmax 11 +/- 4                    | 3040 patients enrolled<br>Completed 4 yrs: Fin (1000)<br>Placebo (883)<br>Mean age: 64 yrs<br>95% Caucasian                                                                                   | 5 mg (n=1524)                                                                                      | Placebo (n=1516)                                        | 48 months                                     | AUA symptom score (all patients):<br>Fin: Baseline 15 ± 6; 3 mth -1.1; 6 mth -1.7; 12 mth -2.7; 18 mth -2.6; 24 mth -2.9; 36 mth -2.9; 48 mth -3.2<br>Placebo: Baseline 15 ± 6; 3 mth -0.7; 6 mth -1.3; 12 mth -1.6; 18 mth -1.5; 24 mth -1.4; 36 mth -1.4; 48 mth -1.2<br>Max urinary flow rate (mL/s):<br>Fin: Baseline 11.0 ± 4.0; 3 mth 0.8; 6 mth 0.9; 12 mth 1.25; 18 mth 1.65; 24 mth 1.6; 36 mth 1.65<br>48 mth 1.9<br>Placebo: Baseline 11.0 ± 4.0; 3 mth 0.25; 6 mth 0.3; 12 mth 0.3; 18 mth 0.3; 24 mth 0.4; 36 mth 0.0; 48 mth 0.25<br>Prostate volume (ml):<br>Fin: Baseline 55 ± 26; 3 mth -2.75 (-5%); 6 mth -4.4 (-8%); 12 mth -9.4 (-17%); 18 mth -9.9 (-18%); 24 mth -9.9 (-18%); 36 mth -9.4 (-17%); 48 mth -9.4 (-17%)<br>Placebo: Baseline 54 ± 25; 3 mth 1.1 (2%); 6 mth 1.6 (3%); 12 mth 2.7 (5%); 18 mth 3.8 (7%); 24 mth 4.3 (8%); 36 mth 5.9 (11%); 48 mth 7.0 (13%) | Quasi-AUA symptom score (all patients):<br>Fin: Baseline 15 ± 6.0; 3 mth 13.9; 6 mth 13.3; 12 mth 12.7; 18 mth 12.3; 24 mth 12.1; 36 mth 12.1; 48 mth 11.8<br>Placebo: Baseline 15 ± 6.0; 3 mth 14.3; 6 mth 13.7; 12 mth 13.4; 18 mth 13.5; 24 mth 13.6; 36 mth 13.6; 48 mth 13.8<br>Max urinary flow rate (mL/s):<br>Fin: Baseline 11.0 ± 4.0; 3 mth 11.8; 6 mth 11.9; 12 mth 12.25; 18 mth 12.65; 24 mth 12.6; 36 mth 11.25; 48 mth 12.9<br>Placebo: Baseline 11.0 ± 4.0; 3 mth 11.325; 6 mth 11.3; 12 mth 11.3; 18 mth 11.3; 24 mth 11.4; 36 mth 11.0; 48 mth 11.25<br>Prostate volume (ml):<br>Fin: Baseline 55 ± 26; 3 mth 52.25; 6 mth 50.6; 12 mth 45.6; 18 mth 45.1; 24 mth 45.1; 36 mth 45.6; 48 mth 45.6<br>Placebo: Baseline 54 ± 25; 3 mth 55.1; 6 mth 55.6; 12 mth 56.7; 18 mth 57.8; 24 mth 58.3; 36 mth 59.9; 48 mth 61.0 | No data                                             | Adverse effects at 1 yr<br>Decreased libido (DL):<br>Fin (6.4%, 98);<br>Placebo (3.4%, 52)<br>Impotence:<br>Fin (8.1%, 123);<br>Placebo (3.7%, 56)<br>Ejaculation disorder (ED):<br>Fin (0.8%, 12);<br>Placebo (0.1%, 2)<br>Adverse effects at yrs 2-4:<br>DL: Fin (2.6%, 40);<br>Placebo (2.6%, 39)<br>Impotence: Fin (5.1%, 78);<br>Placebo (5.1%, 77)<br>ED: Fin (0.2%, 3);<br>Placebo (0.1%, 2) | Total discontinued:<br>Fin (524)<br>Placebo (633)<br>Discontinued because of adverse effects:<br>Fin (176)<br>Placebo (166)<br>Discontinued because of lack of efficacy:<br>Fin (99)<br>Placebo (104)<br>Prostate cancer: Overall incidence was 5% in each group | Surgery or catheterisation for acute urinary retention:<br>Fin (100, 7%)<br>Placebo (199, 13%)<br>Surgery:<br>Fin (69, 5%)<br>Placebo (152, 10%)<br>Acute urinary retention:<br>Fin (42, 3%)<br>Placebo (99, 7%) | R=2<br>DB=1<br>W=1 |
| Nickel et al, 1996        | BPH       | Multicentre, randomised, double blind, placebo controlled, parallel groups. Placebo run-in Assessments at 4 mth intervals.                             | Double   | Moderate symptoms<br>Enlarged prostate by DRE                                                                                | 613 patients.<br>Mean age: 63 years (range 46-80)<br>Obstruction symptom score:<br>Fin: Baseline 10.2 ± 4.8<br>Placebo: Baseline 10.7 ± 4.5<br>Completed trial:<br>Fin (246)<br>Placebo (226) | 5 mg (n=310)                                                                                       | Placebo (n=303)                                         | 24 months                                     | Boyardsky total symptom score:<br>Fin: Baseline 15.8 ± 7.6; 3 mth -1.3; 6 mth -1.5; 12 mth -1.8; 18 mth -1.9; 24 mth -2.1<br>Placebo: Baseline 16.6 ± 7.2; 3 mth -1.3; 6 mth -1.4; 12 mth -0.95; 18 mth -0.8; 24 mth -0.8<br>Mean urinary flow rate (mL/s):<br>Fin: Baseline 11.1 ± 3.7; 6 mth 0.35; 12 mth 0.6; 18 mth 0.65; 24 mth 0.7<br>Placebo: Baseline 10.9 ± 3.5; 6 mth 0.13; 12 mth 0.2; 18 mth 0.18; 24 mth 0.2<br>Max urinary flow rate (mL/s):<br>Fin: Baseline 11.1; 3mth 0.6; 6 mth 0.75; 12 mth 1.0; 18 mth 1.25; 24 mth 1.3<br>Placebo: Baseline 10.9; 3mth 0.4; 6 mth 0.5; 12 mth 0.25; 18 mth 0.3; 24 mth 0.3<br>Prostate volume (cm3):<br>Fin: Baseline 44.1 ± 23.5; 12 mth -7.9 (18%); 24 mth -9.3 (21%)<br>Placebo: Baseline 45.8 ± 22.4; 12 mth 2.7 (6%); 24 mth 3.8 (8.4%)                                                                                              | Boyardsky total symptom score:<br>Fin: Baseline 15.8 ± 7.6; 3 mth 14.5; 6 mth 14.3; 12 mth 14.0; 18 mth 13.9; 24 mth 13.7<br>Placebo: Baseline 16.6 ± 7.2; 3 mth 15.3; 6 mth 15.2; 12 mth 15.65; 18 mth 15.8; 24 mth 15.8<br>Mean urinary flow rate (mL/s):<br>Fin: Baseline 11.1 ± 3.7; 6 mth 11.45; 12 mth 11.7; 18 mth 11.75; 24 mth 11.8<br>Placebo: Baseline 10.9 ± 3.5; 6 mth 11.03; 12 mth 11.1; 18 mth 11.08; 24 mth 11.1<br>Max urinary flow rate (mL/s):<br>Fin: Baseline 11.1; 3 mth 11.7; 6 mth 11.85; 12 mth 12.1; 18 mth 12.35; 24 mth 12.4<br>Placebo: Baseline 10.9; 3 mth 11.3; 6 mth 11.4; 12 mth 11.15; 18 mth 11.2; 24 mth 11.2<br>Prostate volume (cm3):<br>Fin: Baseline 44.1 ± 23.5; 12 mth 36.2; 24 mth 34.8<br>Placebo: Baseline 45.8 ± 22.4; 12 mth 48.5; 24 mth 49.6                                          | No data                                             | Any adverse effect:<br>Fin (251)<br>Placebo (246)<br>Ejaculation disorder:<br>Fin (24)<br>Placebo (5)<br>Impotence:<br>Fin (49)<br>Placebo (19)<br>Libido decreased:<br>fin (31)<br>Placebo (19)                                                                                                                                                                                                    | Total discontinued:<br>Fin (64)<br>Placebo (77)<br>Discontinued because of adverse effects:<br>Fin (28)<br>Placebo (40)<br>Discontinued because of lack of efficacy:<br>Fin (16)<br>Placebo (19)                                                                 | Acute urinary retention or urological intervention (eg TURP):<br>Fin (19; 6.1%)<br>Placebo (31 (10.2%))<br>Prostate cancer:<br>Fin (3)<br>Placebo (6)                                                            | R=2<br>DB=2<br>W=1 |
| Sokeland & Albrecht, 1997 | BPH       | Randomised, double blind, multicentre, placebo controlled, parallel groups. AUA total symptom score                                                    | Double   | Qmax >15 mL/s, voided volume ≥150 ml                                                                                         | Number enrolled: 543<br>Study 1 (n=86):<br>Number completed: 78<br>Mean age 65 years (range 40-80 )<br>Significant lower urinary tract obstruction                                            | 1 capsule (n=244)                                                                                  | 2 capsules Pro 120/160 (Sabal + urtica extract) (n=245) | 48 weeks                                      | AUA total symptom score:<br>Fin: Baseline 11.8 ± 6.6; 12 wks -2.9; 24 wks -3.8; 36 wks -5.0; 48 wks -5.6<br>Pro 160/120: Baseline 11.3 ± 6.5; 12 wks -2.6; 24 wks -3.1; 36 wks -4.1; 48 wks -4.8<br>Mean change from baseline<br>Max urinary flow rate (mL/s):<br>Fin: Baseline 12.7 ± 4.5; 12 wks 1.9 ± 5.4; 24 wks 2.4 ± 6.3; 36 wks 2.6 ± 6.8; 48 wks 2.8 ± 6.6<br>Pro 160/120: Baseline 12.7 ± 4.4; 12 wks 1.6 ± 5.4; 24 wks 1.9 ± 5.6; 36 wks 1.9 ± 5.9; 24 wks 2.0 ± 6.4; 48 wks 2.4                                                                                                                                                                                                                                                                                                                                                                                                     | AUA total symptom score:<br>Fin: Baseline 11.8 ± 6.6; 12 wks 8.9 ± 6.1; 24 wks 8.0 ± 5.7; 36 wks 6.8 ± 5.3; 48 wks 6.2 ± 5.2<br>Pro 160/120: Baseline 11.3 ± 6.5; 12 wks 8.7 ± 6.0; 24 wks 8.2 ± 5.8; 36 wks 7.2 ± 5.7; 48 wks 6.5 ± 5.8<br>Max urinary flow rate (mL/s):<br>Fin: Baseline 12.7 ± 4.5; 12 wks 14.6; 24 wks 15.1; 36 wks 15.3; 48 wks 15.5<br>Pro 160/120: Baseline 12.7 ± 4.4; 12 wks 14.3; 24 wks 14.6; 36 wks 14.6; 24 wks 14.7; 48 wks 15.1                                                                                                                                                                                                                                                                                                                                                                           | No data                                             | Erectile dysfunction:<br>Fin (7)<br>Pro 160/120: (1)                                                                                                                                                                                                                                                                                                                                                | Unknown                                                                                                                                                                                                                                                          | No data                                                                                                                                                                                                          | R=1<br>DB=2<br>W=? |
| [Stoner et al, 1992 a]    | BPH       | Randomised, double blind, placebo controlled, parallel groups.                                                                                         | DB       | Enlarged prostate volume >30 cc by MRI & TRUS (range 28-168 cm <sup>3</sup> )<br>Significant lower urinary tract obstruction | Number enrolled: 86<br>Number completed: 78<br>Mean age 65 years (range 40-80 )                                                                                                               | Study 1 (n=86):<br>Fin 5 mg (n=10)<br>10 mg (n=15)<br>20 mg (n=16)<br>40 mg (n=14)<br>80 mg (n=11) | Study 1: Placebo: (n=14)                                | Study 1: 12 weeks on & 12 weeks off treatment | Prostate volume:<br>Fin 5 mg: Baseline 71.6 ± 39.2, 3 mth -16.0 (-22.8% ± 17.9)<br>Placebo: Baseline 79.7 ± 37.0, 3 mth -3 (-4.1% ± 19.0)                                                                                                                                                                                                                                                                                                                                                                                                                                                                                                                                                                                                                                                                                                                                                      | Prostate volume:<br>Fin 5 mg: Baseline 71.6 ± 39.2, 3 mth 55.5<br>Placebo: Baseline 79.7 ± 37.0, 3 mth 76.7                                                                                                                                                                                                                                                                                                                                                                                                                                                                                                                                                                                                                                                                                                                              | No data                                             | See study 2, since all safety data was combined                                                                                                                                                                                                                                                                                                                                                     | See study 2<br>Discontinued because of adverse effects (study 1): 5 patients                                                                                                                                                                                     | No data                                                                                                                                                                                                          | R=1<br>DB=1<br>W=1 |

| Author                   | Condition                           | Methods                                                                                                                                                                                 | Blinding | Baseline entry criteria                                                                                                                              | Patients                                                                                               | Finasteride Daily dose (mg)                                                                            | Control                                                 | Duration        | Efficacy outcomes<br>Mean change from baseline                                                                                                                                                                                                                                                                                                                                                                                                                                                                                                                                                                          | Efficacy outcomes<br>Absolute values                                                                                                                                                                                                                                                                                                                                                                                                                                                                                         | Efficacy according to prostate size:<br>finasteride | Adverse events                                                                                                                                                                                                                                                                                                                                                                                                                                                               | Discontinuations                                                                                                                                                                                                                                                                                              | AUR, surgery, prostate cancer                                                                                             | Quality score      |                    |
|--------------------------|-------------------------------------|-----------------------------------------------------------------------------------------------------------------------------------------------------------------------------------------|----------|------------------------------------------------------------------------------------------------------------------------------------------------------|--------------------------------------------------------------------------------------------------------|--------------------------------------------------------------------------------------------------------|---------------------------------------------------------|-----------------|-------------------------------------------------------------------------------------------------------------------------------------------------------------------------------------------------------------------------------------------------------------------------------------------------------------------------------------------------------------------------------------------------------------------------------------------------------------------------------------------------------------------------------------------------------------------------------------------------------------------------|------------------------------------------------------------------------------------------------------------------------------------------------------------------------------------------------------------------------------------------------------------------------------------------------------------------------------------------------------------------------------------------------------------------------------------------------------------------------------------------------------------------------------|-----------------------------------------------------|------------------------------------------------------------------------------------------------------------------------------------------------------------------------------------------------------------------------------------------------------------------------------------------------------------------------------------------------------------------------------------------------------------------------------------------------------------------------------|---------------------------------------------------------------------------------------------------------------------------------------------------------------------------------------------------------------------------------------------------------------------------------------------------------------|---------------------------------------------------------------------------------------------------------------------------|--------------------|--------------------|
| [Stoner et al. 1992 b]   | BPH                                 | Randomised, double blind, placebo controlled, parallel groups. 1 wk placebo run-in                                                                                                      | DB       | Prostate volume >30 cc by MRI (range 26 to 279 cm <sup>3</sup> )<br>Significant lower urinary tract obstruction                                      | Number enrolled: 104<br>Number completed: 93<br>Mean age 64 years (range 40-80)                        | Study 2 (n=104):<br>Fin 0.2 mg (n=18)<br>0.5 mg (n=15)<br>1.0 mg (n=17)<br>5 mg (n=15)<br>40 mg (n=13) | Study 2: Placebo (n=25)                                 | Study 2: 24 wks | Boyarsky Total Symptom score:<br>Fin 1/5mg: Baseline 18.4 (no SD); 12 wks -1.85; 24 wks -2.5<br>Placebo: Baseline 16.5 (no SD); 12 wks -0.85; 24 wks -0.5<br><br>Max urinary flow rate (cc/s):<br>Fin 1/5mg: Baseline 9.5 (no SD); 12 wks 2.0; 24 wks 3.5<br>Placebo: Baseline 9.2 (no SD); 12 wks -1.0; 24 wks 0.0<br><br>Prostate volume:<br>Fin 1 mg: Baseline 86.3 ±64.5; 12 wks -12.6 (-14.6% ±16.8); 24 wks -21.1 (-24.4% ±17.5)<br>Fin 5 mg: Baseline 66.6 ±40.4; 12 wks -11.5 (-17.3% ±11.8); 24 wks -18.4 (-27.7% ±10.8)<br>Placebo: Baseline 63.5 ±30.6; 12 wks -3.6 (-5.6% ±20.8); 24 wks -3.3 (-5.2% ±21.1) | Boyarsky Total Symptom score:<br>Fin 1/5mg: Baseline 18.4 (no SD); 12 wks 16.55; 24 wks 15.9<br>Placebo: Baseline 16.5 (no SD); 12 wks 15.65; 24 wks 16.0<br><br>Max urinary flow rate (cc/s):<br>Fin 1/5mg: Baseline 9.5 (no SD); 12 wks 11.5; 24 wks 13.0<br>Placebo: Baseline 9.2 (no SD); 12 wks 8.2; 24 wks 9.2<br><br>Prostate volume:<br>Fin 1 mg: Baseline 86.3 ±64.5; 12 wks 73.7; 24 wks 65.2<br>Fin 5 mg: Baseline 66.6 ±40.4; 12 wks 55.1; 24 wks 48.2<br>Placebo: Baseline 63.5 ±30.6; 12 wks 59.9; 24 wks 60.2 | No data                                             | Study 1 & 2 combined:<br>Serious adverse effects:<br>Fin (13)<br>Placebo (1)<br><br>Headache:<br>Fin (11)<br>Placebo (0)                                                                                                                                                                                                                                                                                                                                                     | Combined data from studies 1 & 2:<br>Total discontinued:<br>Fin (11)<br>Placebo (1)<br><br>Discontinued because of adverse effects (study 2):<br>7 patients                                                                                                                                                   | No data                                                                                                                   | R=1<br>DB=1<br>W=1 |                    |
| Tammela & Kontturi, 1993 | BPH with bladder outlet obstruction | Randomised, double blind, placebo controlled, parallel groups. Boyarsky symptom score                                                                                                   | Double   | Moderate / severe BPH with bladder outlet obstruction. Enlarged prostate-volume by TRUS<br>Max urinary flow rate <15 mL/s.<br>Voiding volume ≥150 ml | Number patients enrolled: 36<br>Number patients completed: 36<br>Mean age 65 years (range 54-80)       | 5 mg (n=19)                                                                                            | Placebo (n=17)                                          | 6 months        | Boyarsky total symptom score:<br>Fin: Baseline 10.4; 6 mth -3.7<br>Placebo: Baseline 9.8; 6 mth -1.1<br><br>Max urinary flow rate (mL/s):<br>Fin: Baseline 7.7 ±2.3; 6 mth +2.4<br>Placebo: Baseline 8.8 ±3.3; 6 mth +1.1                                                                                                                                                                                                                                                                                                                                                                                               | Max urinary flow rate (mL/s):<br>Fin: Baseline 7.7 ±2.3; 6 mth 10.3 ±4.1<br>Placebo: Baseline 8.8 ±3.3; 6 mth 9.9 ±2.9<br><br>Boyarsky total symptom score:<br>Fin: Baseline 10.4; 6 mth 6.7<br>Placebo: Baseline 9.8; 6 mth 7.7                                                                                                                                                                                                                                                                                             | No data                                             | No data                                                                                                                                                                                                                                                                                                                                                                                                                                                                      | None                                                                                                                                                                                                                                                                                                          | No data                                                                                                                   | R=1<br>DB=1<br>W=1 |                    |
| Tenover et al, 1997      | BPH                                 | Multicentre, randomised, double blind, placebo controlled, parallel groups. 1 mth single blind placebo run-in. Assessed at 3 mth intervals. Compliance by pill count. AUA symptom score | Double   | Moderate to severe symptoms of clinically diagnosed BPH. Enlarged prostate on DRE                                                                    | Number patients enrolled: 2808; 2315 randomised<br>Mean age 63 years (range 45-94)<br>Mainly Caucasian | 5 mg (n=1589 per protocol)<br>1736 analysed for safety                                                 | Placebo (n=523 per protocol)<br>579 analysed for safety | 12 months       | AUA symptom score at 12 mth:<br>Fin: Baseline 19.03; 3 mth -3.0; 6 mth -4.2; 12 mth -4.96 (no SD)<br>Placebo: Baseline 18.35; 3 mth -2.5; 6 mth -3.5; 12 mth -3.71 (no SD)                                                                                                                                                                                                                                                                                                                                                                                                                                              | AUA symptom score at 12 mth:<br>Fin: Baseline 19.03; 3 mth 16.03; 6 mth 14.8; 12 mth 14.07<br>Placebo: Baseline 18.35; 3 mth 15.8; 6 mth 14.8; 12 mth 14.64<br><br>Patient global rating of improvement at 12 mth:<br>Fin (51.9%)<br>Placebo (42.9%)                                                                                                                                                                                                                                                                         | No data                                             | 1736 (Fin) & 579 (placebo) patients in safety analyses.<br>Any adverse effect:<br>Fin (75.4%, 1309)<br>Placebo (72.5%, 412)<br><br>Serious adverse effect:<br>Fin (13%, 226)<br>Placebo (13.3%, 77)<br><br>Any sexual dysfunction:<br>Fin (13.8%, 240)<br>Placebo (6.6%, 38)<br><br>Impotence:<br>Fin (8.1%, 141)<br>Placebo (3.8%, 22)<br><br>Libido decreased:<br>Fin (5.4%, 94)<br>Placebo (3.3%, 19)<br><br>Ejaculation disorder:<br>Fin (4.0%, 69)<br>Placebo (0.9%, 5) | Total discontinued:<br>Fin (16.6%, 263)<br>Placebo (16.4%, 86)<br><br>Acute urinary retention:<br>Fin (0.2%, 3)<br>Placebo (0.4%, 2)<br><br>TURP:<br>Fin (0.8%, 14)<br>Placebo (0.9%, 5)<br><br>Prostate cancer:<br>Fin: 0.5%<br>Placebo: 0.5%<br><br>BPH worse/no improvement:<br>Fin: 0.5%<br>Placebo: 0.5% | 1736 (Fin) & 579 (placebo) patients in safety analyses.<br>Acute urinary retention:<br>Fin (0.2%, 3)<br>Placebo (0.4%, 2) | No data            | R=1<br>DB=1<br>W=1 |
| Yu et al, 1995           | BPH                                 | Randomised, double blind, placebo controlled, parallel groups. 2 wk washout. TRUS & DRE to confirm BPH & rule out prostate cancer. Assessed at 2 mth intervals. AUA symptom score       | Double   | Bothersome symptoms of BPH.                                                                                                                          | Number patients enrolled: 50<br>Number patients completed: 46<br>Mean age: 65 years (range 50-82)      | 5 mg (n=25)                                                                                            | Placebo (n=25)                                          | 6 months        | AUA symptom score:<br>Fin: Baseline 19.45 ±6.63; 3 mth -1.95 (-10%); 6 mth -5.98 (-30% ±20)<br>Placebo: Baseline 16.68 ±4.06; 3 mth -1.17(-7%); 6 mth -2.36 (-12 ±20)<br><br>Max urinary flow rate (mL/s):<br>Fin: Baseline 11.19 ±2.47; 6 mth 1.42 (20% ±26)<br>Placebo: Baseline 11.44 ±4.76; 6 mth 0.17 (3% ±19)<br><br>Prostate volume:<br>Fin: Baseline 26.70 ±9.26; 6 mth -4.08 (-14% ±11)<br>Placebo: Baseline 20.12 ±7.85; 6 mth 1.26 (1%±12)                                                                                                                                                                   | AUA symptom score:<br>Fin: Baseline 19.45 ±6.63; 3 mth 17.5; 6 mth 13.47 ±4.36<br>Placebo: Baseline 16.68 ±4.06; 3 mth 15.5; 6 mth 14.32 ±4.26<br><br>Prostate volume:<br>Fin: Baseline 26.70 ±9.26; 6 mth 22.62 ±7.76 ±26<br>Placebo: Baseline 20.12 ±7.85; 6 mth 21.38 ±9.88<br><br>Max urinary flow rate (mL/s):<br>Fin: Baseline 11.19 ±2.47; 6 mth 12.61 ±3.3 ±4.68<br>Placebo: Baseline 11.44 ±4.76; 6 mth 11.61 ±4.68                                                                                                 | No data                                             | Adverse effects were few & minor.<br>Finasteride: decreased libido (2)<br>Dry mouth (1)<br><br>Discontinued because of lack of efficacy:<br>Fin (0)<br>Placebo (2)<br><br>Gastric irritation (1)<br><br>Discontinued because of adverse effects:<br>None                                                                                                                                                                                                                     | Total number discontinued:<br>Fin (1)<br>Placebo (3)<br><br>Discontinued because of lack of efficacy:<br>Fin (0)<br>Placebo (2)                                                                                                                                                                               | No data                                                                                                                   | R=1<br>DB=1<br>W=1 |                    |
